# Supplementary figures and images for: BK channel modulation by positively charged peptides and auxiliary γ subunits mediated by the Ca2+-bowl site
Source: PubMed Central journal article supplement — J Gen Physiol. 2023 May 2;155(6):e202213237. doi: 10.1085/jgp.202213237 (PMC10163825; doi:10.1085/jgp.202213237), 2023-05-02

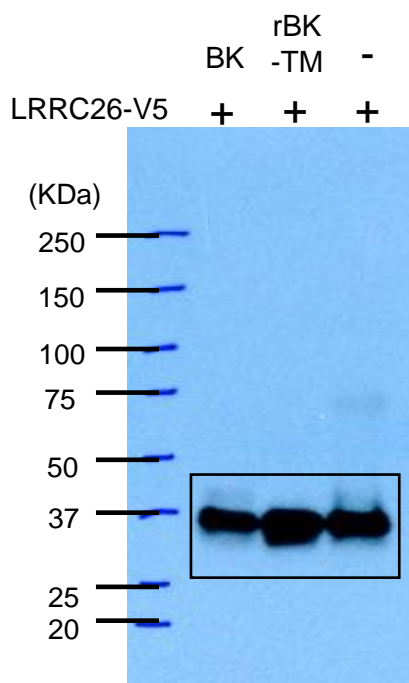

Input: V5

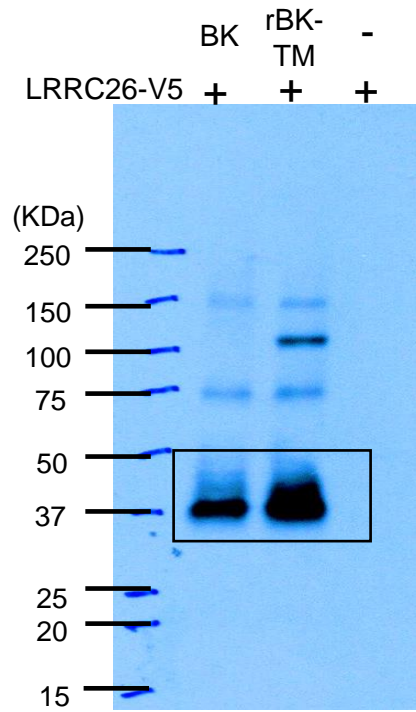

IP: FLAG

IB: V5

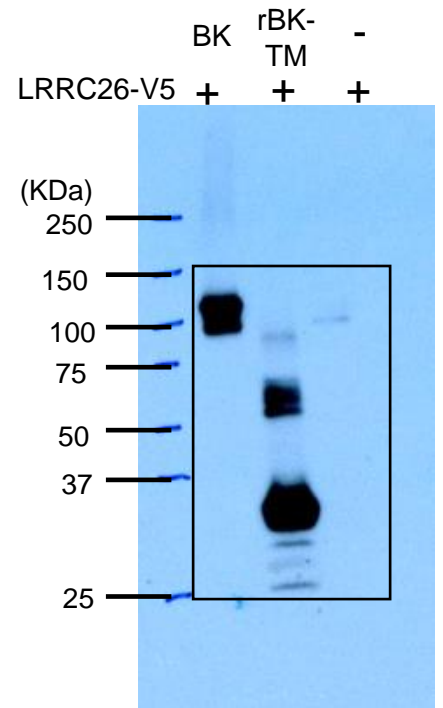

IP: FLAG

IB: FLAG

Supplement: JGP_202213237_SourceDataF1.pdf [file JGP_202213237_SourceDataF1.pdf]

BK WT 5D5N -  
LRRC26-FLAG + + +

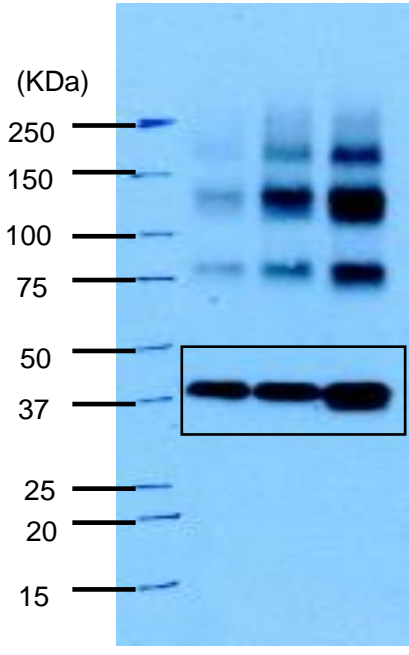

Input: FLAG

BK WT 5D5N -  
LRRC26-FLAG + + +

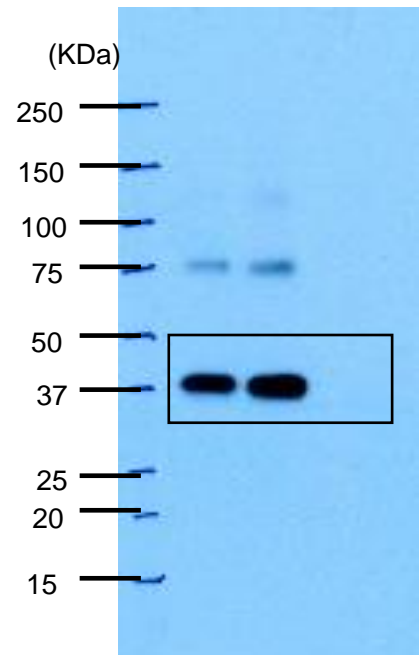

IP: BK  
IB: FLAG

BK WT 5D5N -  
LRRC26-FLAG + + +

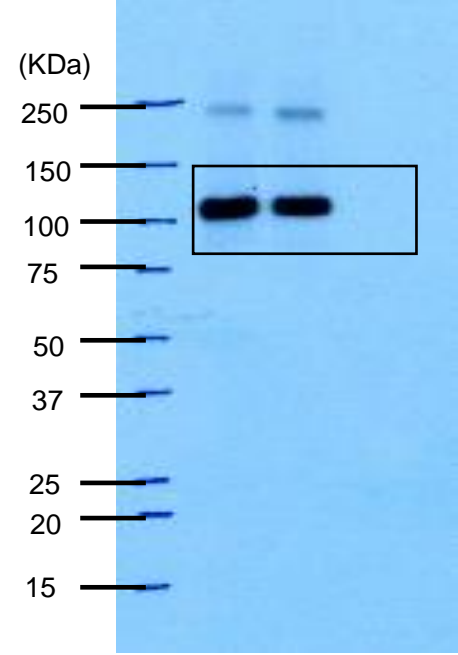

IP: BK  
IB: BK

Supplement: JGP_202213237_SourceDataF6.pdf [file JGP_202213237_SourceDataF6.pdf]
